# Supplementary material for: The electronic structure of Ge9[Si(SiMe3)3]3−: a superantiatom complex
Source: Royal Society of Chemistry journal article supplement (doi:10.1039/c2cp23229d), 2012-01-01
Supplement: c2cp23229d.pdf [file c2cp23229d.pdf]

## Supplementary Information

### The Electronic Structure of $\text{Ge}_9[\text{Si}(\text{SiMe}_3)_3]_3^-$ : A Superantiatom Complex

*P. Andre Clayborne and Hannu Häkkinen*

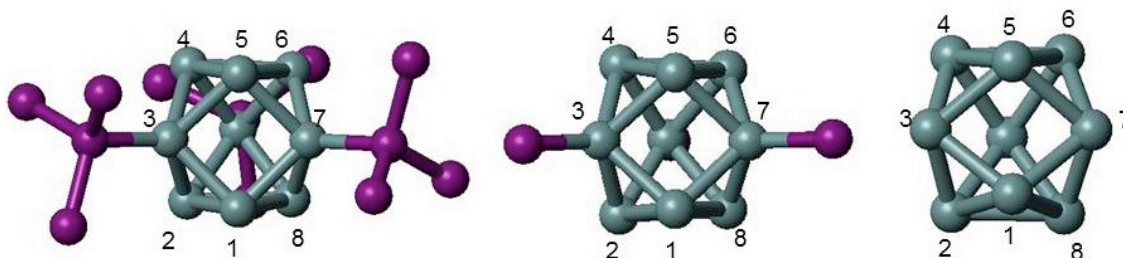

Figure S1. Molecular structures (bottom view) of  $\text{Ge}_9[\text{Si}(\text{SiMe}_3)_3]_3^-$ ,  $\text{Ge}_9(\text{SiH}_3)_3^-$  and  $\text{Ge}_9\text{H}_3^-$  with labels corresponding to Table S1. The grey and purple ball represent the germanium and silicon atoms respectively; carbon and hydrogen atoms are omitted for clarity.

Table S1: Bond lengths (Angstroms) and dihedral angles for  $\text{Ge}_9[\text{Si}(\text{SiMe}_3)_3]_3^-$ ,  $\text{Ge}_9(\text{SiH}_3)_3^-$  and  $\text{Ge}_9\text{H}_3^-$ .

|         | $\text{Ge}_9[\text{Si}(\text{SiMe}_3)_3]_3^-$ | $\text{Ge}_9(\text{SiH}_3)_3^-$ | $\text{Ge}_9\text{H}_3^-$ |
|---------|-----------------------------------------------|---------------------------------|---------------------------|
| Ge1-Ge2 | 2.72                                          | 2.68                            | 2.76                      |
| Ge1-Ge3 | 2.58                                          | 2.58                            | 2.58                      |
| Ge1-Ge8 | 2.68                                          | 2.70                            | 2.78                      |
| Ge1-Ge7 | 2.58                                          | 2.57                            | 2.57                      |
| Ge2-Ge3 | 2.58                                          | 2.58                            | 2.54                      |
| Ge2-Ge8 | 2.70                                          | 2.77                            | 2.66                      |
| Ge2-Ge4 | 3.38                                          | 3.48                            | 3.75                      |
| Ge3-Ge4 | 2.58                                          | 2.58                            | 2.55                      |
| Ge3-Ge5 | 2.58                                          | 2.57                            | 2.58                      |
| Ge3-Ge7 | 3.62                                          | 3.43                            | 3.79                      |
| Ge4-Ge5 | 2.71                                          | 2.69                            | 2.76                      |
| Ge4-Ge6 | 2.71                                          | 2.76                            | 2.66                      |
| Ge5-Ge6 | 2.67                                          | 2.71                            | 2.77                      |
| Ge5-Ge7 | 2.59                                          | 2.57                            | 2.57                      |
| Ge6-Ge7 | 2.59                                          | 2.58                            | 2.55                      |
| Ge6-Ge8 | 3.55                                          | 3.39                            | 3.68                      |
| Ge7-Ge8 | 2.59                                          | 2.58                            | 2.55                      |

|             |       |       |       |
|-------------|-------|-------|-------|
| Ge1-Ge3-Ge2 | 63.76 | 61.79 | 65.22 |
| Ge2-Ge1-Ge8 | 59.98 | 58.60 | 57.29 |
| Ge2-Ge3-Ge4 | 82.00 | 84.70 | 94.84 |
| Ge3-Ge1-Ge7 | 89.10 | 83.70 | 94.89 |
| Ge8-Ge7-Ge6 | 86.69 | 82.13 | 92.75 |

Table S2. Number of delocalized electrons ( $n_e$ ) and calculated<sup>#</sup> HOMO-LUMO gaps (Gap) and Electron Affinities (EA) superatoms, superatom complexes and the superantiatom complex  $\text{Ge}_9[\text{Si}(\text{SiMe}_3)_3]_3^-$ . The energies are in eV.

|                                                         | $n_e$ | Gap  | EA  |
|---------------------------------------------------------|-------|------|-----|
| $\text{Ge}_9[\text{Si}(\text{SiMe}_3)_3]_3^-$           | 40    | 2.17 | n/a |
| $\text{Ge}_9[\text{Si}(\text{SiMe}_3)_3]_3$             | 39    | 0.36 | 2.9 |
| $\text{Al}_{13}^-$                                      | 40    | 1.95 | n/a |
| $\text{Al}_{13}$                                        | 39    | 0.58 | 3.4 |
| $\text{Au}_{102}(\text{SC}_7\text{O}_2\text{H}_5)_{44}$ | 58    | 0.48 | *   |
| $\text{Ga}_{23}[\text{N}(\text{SiMe}_3)_2]_{11}$        | 58    | 1.34 | 2.5 |
| $\text{Al}_{50}\text{Cp}^*_{12}$                        | 138   | 0.94 | 1.7 |

\*The electron affinity has not been determined.

<sup>#</sup>The HOMO-LUMO gaps and electron affinities were calculated using GPAW (see computational details in the main text for more information). The computational details for Al, Au, S, and Ga can be found in references 14 and 15 from the main text.

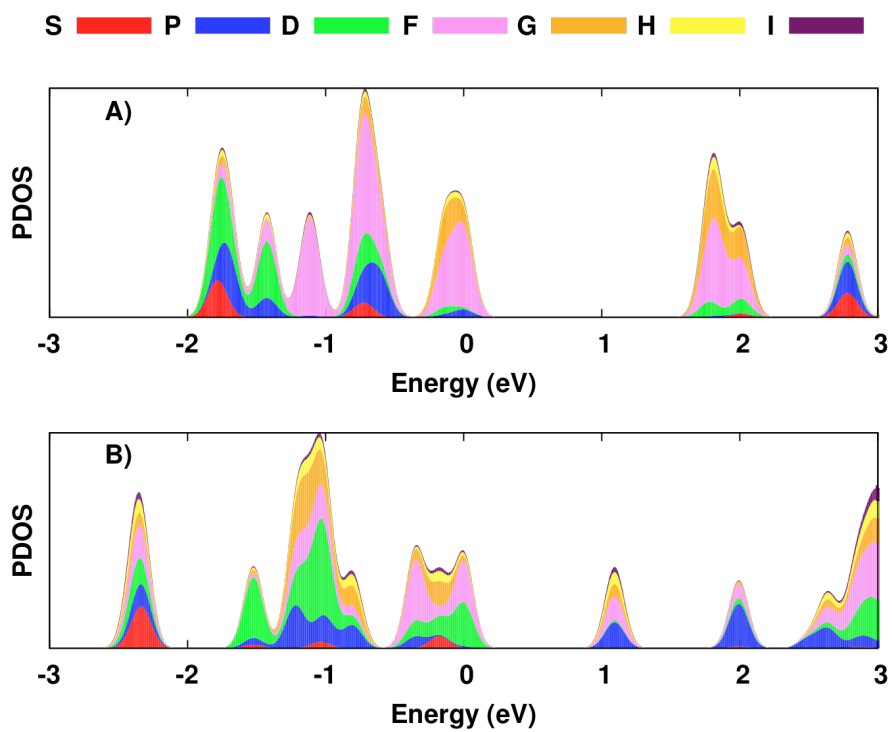

Figure S2. The angular-momentum-projected electron density of states (PDOS) between -3 to 3 eV for  $\text{Ge}_9$  (Panel A) and  $\text{Ge}_9[\text{Si}(\text{SiMe}_3)_3]_1^-$  (Panel B). For more information refer to Figure 2 in the main text.
